## Improving the efficiency of de Bruijn graph construction using compact universal hitting sets

Yael Ben-Ari<sup>1</sup>, Lianrong Pu<sup>1</sup>, Yaron Orenstein<sup>2</sup>, Ron Shamir<sup>1\*</sup>

<sup>1</sup>Blavatnik School of Computer Science, Tel-Aviv University, Tel-Aviv, Israel

<sup>2</sup>School of Electrical and Computer Engineering, Ben-Gurion University of the Negev, Beer-Sheva, Israel

\*To whom correspondence should be addressed: [rshamir@tau.ac.il](mailto:rshamir@tau.ac.il)

**Abstract:** High-throughput sequencing techniques generate large volumes of DNA sequencing data at ultra-fast speed and extremely low cost. As a consequence, sequencing techniques have become ubiquitous in biomedical research and are used in hundreds of genomic applications. Efficient data structures and algorithms have been developed to handle the large datasets produced by these techniques. The prevailing method to index DNA sequences in those data structures and algorithms is by  $k$ -mers ( $k$ -long substrings) known as minimizers. Minimizers are the smallest  $k$ -mers selected in every consecutive window of a fixed length in a sequence, where the smallest is determined according to a predefined order, e.g., lexicographic. Recently, a new  $k$ -mer order based on a universal hitting set (UHS) was suggested. While several studies have shown that orders based on a small UHS have improved properties, the utility of using a small UHS in high-throughput sequencing analysis tasks has not been demonstrated to date.

Here, we demonstrate the practical benefit of UHSs for the first time, in the genome assembly task. Reconstructing a genome from billions of short reads is a fundamental task in high-throughput sequencing analyses. de Bruijn graph construction is a key step in genome assembly, which often requires very large amounts of memory and long computation time. A critical bottleneck lies in the partitioning of DNA sequences into bins. The sequences in each bin are assembled separately, and the final de Bruijn graph is constructed by merging the bin-specific subgraphs. We incorporated a UHS-based order in the bin partition step of the Minimum Substring Partitioning algorithm of Li *et al.* (2013). Using a UHS-based order instead of lexicographic- or random-ordered minimizers produced lower density minimizers with more balanced bin partitioning, which led to a reduction in both runtime and memory usage.

# 1 Introduction

Large amounts of DNA sequencing data are generated today in almost any biological or clinical study. Due to the low cost of sequencing, it has become standard to probe and measure molecular interactions and biomarkers using DNA read quantities [13]. Technologies based on high-throughput sequencing (HTS) have been developed for the major genomics tasks: genetic and structural variation detection, gene expression quantification, epigenomic signal quantification, protein binding measurements, and many more [5]. A first step in utilizing all these data types is the computational analysis of HTS data. Key challenges include read mapping to a reference genome, read compression, storing reads in a data structure for fast querying, and finding read overlaps. As a result, many computational methods were developed to analyze HTS data, and the development of new methods is ongoing [1].

Many methods for analyzing HTS data use minimizers to obtain speed-up and reduce memory usage [14, 15, 7]. Given integers  $w$  and  $k$ , the *minimizer* of an  $L = w + k - 1$ -long sequence is the smallest  $k$ -mer among the  $w$  contiguous  $k$ -mers in it, where the smallest is determined based on a predefined order, e.g., lexicographic [16]. For a longer sequence, all  $L$ -long windows are scanned and the minimizer is selected in each one (Figure 1a). Using the minimizers to represent the  $L$ -long windows has three key advantages: (i) the sampling interval is small; (ii) the same  $k$ -mers are often selected from overlapping windows; and (iii) identical windows have the same minimizer. Minimizers help design algorithms that are more efficient in both runtime and memory usage by reducing the amount of information that is processed while losing little information. Minimizers were shown to be helpful and are used in many different settings, such as partitioning input sequences [3, 14, 15], generating sparse data structures [4, 18], and sequence classification [17].

Recently, the concept of a universal hitting set (UHS) was introduced as a way to improve minimizers [12]. For integers  $k$  and  $L$ , a set of  $k$ -mers  $U_{kL}$  is called a UHS if every possible sequence of length  $L$  contains at least one  $k$ -mer from  $U_{kL}$  as a contiguous substring. It was shown that by using a UHS of small size, one can design an order for a minimizer scheme that results in fewer selected  $k$ -mers compared to the orders commonly used in current applications (i.e., lexicographic or random orders) [10]. Therefore, using UHSs has the potential to provide smaller signatures than currently used orders, and as a result reduce runtime and memory usage of sequencing applications. We and others recently developed algorithms to generate small UHSs [12, 10], but so far the prevailing methods in HTS analysis employ a lexicographic or random order. To date, no method has been developed to take advantage of the improved properties of UHSs.

In this study we demonstrate, for the first time, the benefit of UHSs in a HTS analysis task: de Bruijn graph construction for genome assembly by a disk-based partition method. We introduce a UHS into the graph construction step of the Minimum Substring Partition assembly algorithm [9]. In tests on several genomic datasets, the new method had lower memory usage, shorter runtime and more balanced disk partitions. The code of our method is publicly available at [github.com/Shamir-Lab/MSP\\_UHS](https://github.com/Shamir-Lab/MSP_UHS).

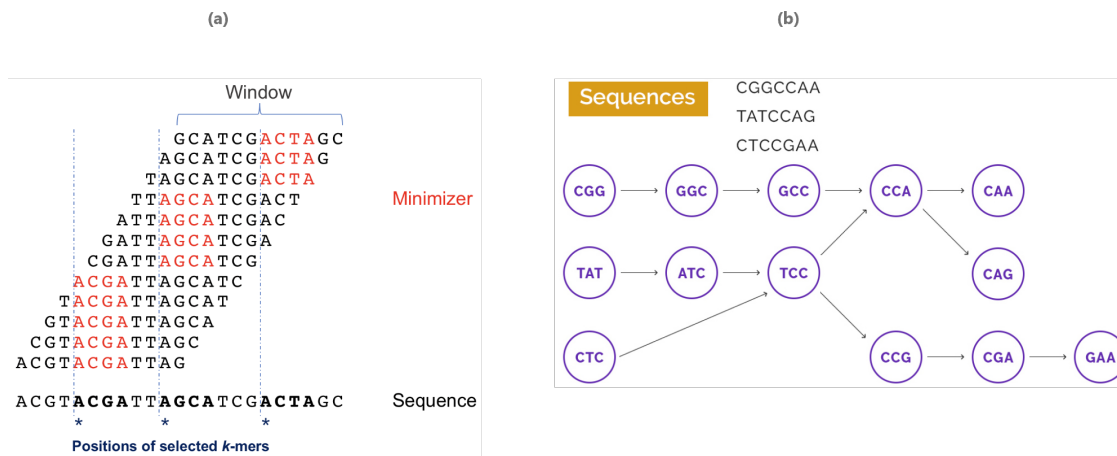

Figure 1: **Illustrations of preliminary definitions.** (a) A minimizers scheme ( $k = 4$ ,  $w = 9$ ). The input sequence is broken into windows of length  $L = w + k - 1 = 12$ , and the minimizer in each window is selected. Consecutive windows tend to select the same minimizer. The positions of the selected  $k$ -mers constitute a sampling of the original sequence. (b) de Bruijn graph of order 3 for three DNA sequences. The vertices are the 3-mers contained in the set of sequences. Edges connect two vertices if the 4-mer they represent is contained in a sequence in the set.

## 2 Background and Preliminaries

### 2.1 Definitions

#### 2.1.1 Basic definitions

A *read* is a string over the DNA alphabet  $\Sigma = \{A, C, G, T\}$ . A  $k$ -mer is a  $k$ -long string over  $\Sigma$ . Given a read  $s$ ,  $|s| = n$ ,  $s[i, j]$  denotes the substring of  $s$  from the  $i$ -th character to the  $j$ -th character, both inclusive. (Here and throughout, substrings are assumed to be contiguous.)  $s$  contains  $n - k + 1$   $k$ -mers:  $s[0, k - 1]$ ,  $s[1, k]$ ,  $\dots$ ,  $s[n - k, n - 1]$ . Two  $k$ -mers in  $s$  that overlap in  $k - 1$  letters, i.e.,  $s[i, k + i - 1]$  and  $s[i + 1, k + i]$ , are called *adjacent* in  $s$ .

#### 2.1.2 De Bruijn graphs

Given a set of strings  $S = \{S_0, S_1, S_2, \dots, S_{m-1}\}$  over  $\Sigma$  and an integer  $k \geq 2$ , the *de Bruijn graph* of  $S$  of order  $k$  (Figure 1b) is a directed graph  $dBG_k(S) = (V, E)$  where:

$$V = \left\{ v \in \Sigma^k \mid \exists j \in \{0, 1, \dots, m-1\} \text{ such that } v \text{ is a substring of } S_j \right\}$$

$$E = \left\{ (u, v) \mid u = S_j[i, k + i - 1], v = S_j[i + 1, k + i] \text{ for some } j \text{ and } i \right\}$$

Modern genome assembly algorithms are based on de Bruijn graph construction. This process breaks each input read into  $k$ -mers (vertices in the graph) and then connects adjacent  $k$ -mers according to their overlap relations in the reads (edges). The graph represents the reconstructed genome. This process can assemble very large quantities (even billions) of reads. The most memory consuming and time-intensive part in assembly algorithms is the de Bruijn graph construction step [9].

### 2.1.3 Minimizers and orders

An order  $o$  on  $\Sigma^k$  is a one-to-one function  $o : \Sigma^k \rightarrow \{1, 2, \dots, |\Sigma|^k\}$ .  $k$ -mer  $m_1$  is smaller than  $k$ -mer  $m_2$  according to order  $o$  if:  $o(m_1) < o(m_2)$ . In other words, an order is a permutation on the set of all  $k$ -mers. A *minimizer* for a triplet  $(s, o, k)$  is the smallest  $k$ -long substring  $m$  in sequence  $s$  according to order  $o$ . We also call  $m$  the  $o$ -minimizer  $k$ -mer in  $s$ . A *minimizers scheme* is a function  $f_{k,w}$  that selects the start position of a minimizer  $k$ -mer in every sequence of length  $L = w + k - 1$ , i.e.,  $f : \Sigma^{w+k-1} \rightarrow [0 : w - 1]$  (Figure 1a).

### 2.1.4 Particular density

The set of selected positions of a scheme  $f_{k,w}$  on a string  $s$  is  $M_{f_{k,w}}(s) = \{i + f_{k,w}(s[i, i + k + w - 2]) \mid 0 \leq i \leq |s| - w - k + 1\}$  (asterisks in Figure 1a). The *particular density* of a scheme  $f_{k,w}$  on a string  $s$  is the proportion of  $k$ -mers selected:

$$d_{f,k,w}(s) = \frac{|M_{f,k,w}(s)|}{|s| - k + 1} \quad (1)$$

The trivial upper and lower bounds for the density are  $1/w \leq d_{f,k,w} \leq 1$ , where  $1/w$  corresponds to scanning the sequence from left to right and selecting exactly one position in every new non-overlapping window, and 1 corresponds to selecting every position [10]. In general, lower density can lead to greater computational efficiency and is therefore desirable.

### 2.1.5 Universal hitting sets

A set of  $k$ -mers  $M$  *hits* sequence  $s$  if there exists a  $k$ -mer in  $M$  that is a substring in  $s$ . A *universal hitting set* (UHS)  $U_{kL}$  is a set of  $k$ -mers that hits every  $L$ -long string over  $\Sigma$ . A trivial UHS always exists by taking all  $(|\Sigma|^k)$   $k$ -mers. A UHS  $M$  can be used in a minimizers scheme as follows: Define an order on  $M$ 's  $k$ -mers, and for any  $L$ -long window select the minimum  $k$ -mer from  $M$  in the window according to the defined order. The universality of  $M$  guarantees that there will always be at least one  $k$ -mer from  $M$  in any  $L$ -long window.

## 2.2 Minimum Substring Partitioning

The Minimum Substring Partitioning (MSP) method is a memory-efficient and fast algorithm for de Bruijn graph construction [9]. MSP breaks reads into multiple bins so that each bin can be loaded into memory, processed individually, and later merged with other bins to form the de Bruijn graph. The lexicographically smallest  $k$ -mer in each sequence window (i.e., the minimizer) is used as key for that window.

MSP partitions  $L$ -long windows into multiple disjoint bins, in a way that tends to retain adjacent  $L$ -mers in the same bin. This has two advantages: (i) consecutive  $L$ -mers are combined into *super  $L$ -mers* (substrings

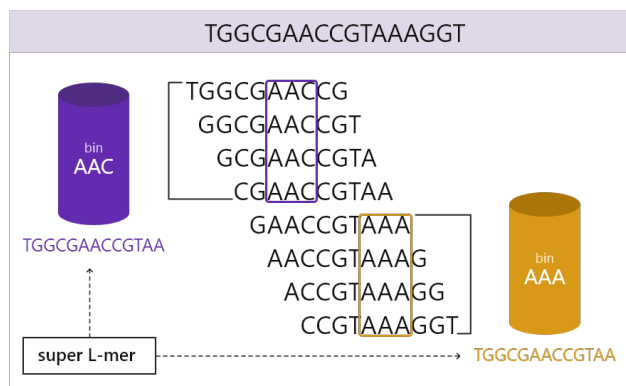

Figure 2: **The partitioning step of the MSP method.** A read is scanned in windows of length 10. The 3-mer minimizer in each window is marked with the rectangles.

of length  $\geq L$ ), which reduces the space requirements; (ii) local assembly can be performed on the bins in parallel, and later all assemblies are merged to generate a global assembly.

MSP is motivated by the fact that adjacent  $L$ -mers tend to share the same minimizer  $k$ -mer, since there is an overlap of length  $L - 1$  between them. Figure 2 shows an example of the partitioning step of MSP with  $L = 10$  and  $k = 3$ . In this example, the first four  $L$ -mers share the minimizer  $AAC$ ; and the last four  $L$ -mers share the minimizer  $AAA$ . In this case, instead of generating all seven  $L$ -mers separately, MSP generates only two super  $L$ -mers. The first four  $L$ -mers are combined into  $TGGCGAACGTAA$ , and this super  $L$ -mer is assigned to the bin labeled  $AAC$ . Similarly, the last four  $L$ -mers are combined into a super  $L$ -mer  $GAACCGTAAAGT$ , and this super  $L$ -mer is assigned to the bin labeled  $AAA$ . In general, given a read  $r = r_0r_1 \dots r_{n-1}$ , if the  $j$  adjacent  $L$ -mers from  $r[i, i + L - 1]$  to  $r[i + j - 1, i + j + L - 2]$  share the same minimizer  $m$  (and  $j$  is maximal with regard to that property), then the super  $L$ -mer  $r_i r_{i+1} \dots r_{i+j+L-2}$  is assigned to the bin labeled  $m$  without breaking it into  $j$  individual  $L$ -mers. This procedure reduces memory usage as instead of keeping  $j \cdot L$  characters in memory, only  $j + L - 1$  characters are kept. If  $j$  tend to be large, this strategy dramatically reduces memory usage. To reduce the number of bins, MSP warps the bins using a hash function into a user-defined number of bins  $nb$ .

### 3 Methods

MSP uses a minimizers scheme with a lexicographic order [9]. We denote this method `Lexico_MSP`. We modified MSP to employ a minimizers scheme with a UHS-based order and denote this algorithm `UHS_MSP`. Previous studies have shown that  $k$ -mers from a small UHS are more evenly distributed along the genome than lexicographic or random minimizers [12]. Hence, we reasoned that using a small UHS in the MSP algorithm would lead to a flatter distribution of bin sizes and thus reduce memory usage and runtime.

Since a pseudo-random order was shown to have better properties than lexicographic order when used in a minimizers scheme [10], we also tested a variant where the lexicographic order of the minimizers scheme in the original MSP method is replaced by a pseudo-random order. We denote this variant `Random_MSP`.

UHS\_MSP receives as input a set of reads and generates a corresponding de Bruijn graph by the following steps. A pseudo-code of the algorithm can be found in Algorithm 1.

1. **Partitioning.** This step uses a pre-generated UHS  $U_{kL}$ . By default, we used a UHS generated by the DOCKS algorithm [12] with  $k = 12$  and  $L = 60$ . We saved  $U_{kL}$  in a compressed  $|\Sigma|^k$  bit array with the values '1' for the  $k$ -mers that are in  $U_{kL}$  and '0' otherwise. A new order based on  $U_{kL}$  is defined as follows: all  $k$ -mers in  $U_{kL}$  are smaller than  $k$ -mers not in  $U_{kL}$ , and the order of  $k$ -mers in  $U_{kL}$  is random. By the definition of a UHS, a minimizers scheme based on this order selects only  $k$ -mers from  $U_{kL}$  as minimizers for any  $L$ -long window, so the order of  $k$ -mers not in  $U_{kL}$  is immaterial. We call such an order a *UHS-based minimizer order*.

Reads are broken into segments (super  $L$ -mers) that are placed in bins as follows. For each read, all  $L$ -long windows are scanned and their minimizers are found. The minimizer of the currently scanned window is denoted as *currMin* and its start position is denoted as *currMinPos*. The scanning is done by sliding an  $L$ -long window to the right one symbol at a time, until the end of the read. After each slide, UHS\_MSP checks whether *currMinPos* is still within the range of the current window. If not, it re-scans the window to find the current minimizer and updates *currMin* and *currMinPos*. Otherwise, it tests whether the last  $k$ -mer in the current window is smaller than *currMin* based on the UHS-based minimizer order. If so, the last  $k$ -mer is set as *currMin* and its start position as *currMinPos*.

To enable fast comparison of  $k$ -mers in  $U_{kL}$ , the pseudo-random order is implemented using a  $2k$ -long bit vector  $x$  (the *seed*), with bits selected independently and equiprobably to be 0 or 1. For  $m \in U_{kL}$  define  $\beta(m) = b(m) \oplus x$ , where  $b(m)$  is the binary representation of  $k$ -mer  $m$  and " $\oplus$ " is the bit-wise xor operation. The order  $o$  of  $m$  is defined as the number whose binary representation is  $\beta(m)$ . Hence, deciding if  $o(m) < o(m')$  is done by two xor operations and one comparison.

Each time a new minimizer is selected, a super  $L$ -mer is generated by merging all the  $L$ -long windows sharing the previous minimizer, and the label of that super  $L$ -mer is its minimizer (Figure 2). To obtain the prescribed number  $nb$  of bins, a hash function is used to map the labels to a space of size  $nb$ .

A unique ID is assigned to each  $L$ -mer when scanning the reads. As a result, identical  $L$ -mers in different positions in the data are assigned different IDs. Those will be merged in the next step.

2. **Mapping and merging.** These steps are the same as in [9]. We briefly outline them here for completeness, since the changes we introduce in the partitioning step affect their efficiency. In the mapping step, each bin is loaded separately into the memory, and identical  $L$ -mers in different positions in the bin are combined to have the same unique integer vertex ID by generating an ID replacement table per bin. Since we expected the change in the partitioning step to create bins with sizes that are more uniformly distributed, we reasoned that the maximum bin size and the maximum memory would decrease as well. The merging step merges the ID replacement tables of all bins and generates a global ID replacement table.

The algorithm outputs sequences of IDs. Each ID is a vertex in the graph ( $L$ -mer) and two adjacent IDs represent an edge in the graph. This way, each read is represented by a sequence of the consecutive vertices of its  $L$ -mers in the graph, while identical  $L$ -mers have the same ID.

---

**Algorithm 1** UHS Minimum Substring Partitioning.

*Input:* A set of strings  $S = (S_0, S_1, \dots, S_{m-1})$ , where  $|S_i| = readLen$ , integers  $k, L, nb$ ,  
a UHS-based order  $o$  for a UHS  $U_{kL}$ .

*Output:* The partition -  $nb$  bins with the set of super  $L$ -mers in each one.

---

```
1: for  $j$  from 0 to  $m - 1$  do
2:    $currMin$  = the  $o$ -minimum  $k$ -mer of  $S_j[0, L - 1]$ 
3:    $currMinPos$  = the start position of  $currMin$  in  $S_j$ 
4:    $currStart$  = 0 /* the start position of the current super  $L$ -mer */
5:   for  $i$  from 1 to  $readLen - L$  do
6:     if  $i > currMinPos$  then
7:       generate a super  $L$ -mer  $sLmer = S_j[currStart, i + L - 2]$ 
8:        $currStart = i$ 
9:       write  $sLmer$  in bin number  $hash(currMin)$ 
10:       $currMin$  = the  $o$ -minimum  $k$ -mer of  $S_j[i, i + L - 1]$ 
11:       $currMinPos$  = the start position of  $currMin$  in  $S_j$ 
12:     else
13:       if the last  $k$ -mer of  $S_j[i, i + L - 1]$  is in  $U_{kL}$  and smaller than  $currMin$  then
14:         generate a super  $L$ -mer  $sLmer = S_j[currStart, i + L - 2]$ 
15:          $currStart = i$ 
16:         write  $sLmer$  in bin number  $hash(currMin)$ 
17:          $currMin$  = the last  $k$ -mer of  $S_j[i, i + L - 1]$ 
18:          $currMinPos$  = the start position of  $currMin$  in  $S_j$ 
```

---

## 4 Results

We compared UHS\_MSP to the original MSP method (called here Lexico\_MSP) and to MSP with random  $k$ -mer order (Random\_MSP) in terms of speed, memory usage, particular density and distribution of bin sizes on four real-life datasets (Table 1). The human chr14 and bee datasets were downloaded from the GAGE database ([gage.cbcb.umd.edu/data/index.html](http://gage.cbcb.umd.edu/data/index.html)). The *E. coli* (PRJNA431139) and the human genome data (SRX016231) were downloaded from SRA. (The bee dataset was also used in [9], but the other datasets used in that study were unavailable.) We used the same parameters as in [9] for comparison, i.e.,  $k = 12$ ,  $L = 60$ , and  $nb = 1000$ . All the experiments were measured on Intel(R) Xeon(R) CPU E5-2699 v4 @ 2.20GHz server with 44 cores and 792 GB of RAM. To exclude the impact of parallelization, all measurements were done on a single core.

### 4.1 Particular density comparison

We calculated the particular density of the MSP algorithms on the four datasets by counting the number of selected positions (unique  $minPos$  in the partitioning step of the algorithm) and dividing it by the number of all possible positions. UHS\_MSP achieved lower density than Lexico\_MSP and Random\_MSP on all four datasets (Table 1), in accordance with the results of Marçias *et al.* on other genomes [10]. Lexico\_MSP had

| Dataset        | Size (GB) | Avg. read length | Particular density |            |              |
|----------------|-----------|------------------|--------------------|------------|--------------|
|                |           |                  | Lexico_MSP         | Random_MSP | UHS_MSP      |
| <i>E. coli</i> | 2.9       | 101              | 0.041              | 0.034      | <b>0.031</b> |
| Human chr14    | 9.4       | 101              | 0.073              | 0.065      | <b>0.062</b> |
| Bee            | 93.8      | 124              | 0.059              | 0.056      | <b>0.053</b> |
| Human          | 432       | 100              | 0.057              | 0.056      | <b>0.055</b> |

Table 1: Characteristics of the four benchmark datasets and particular density results.

the highest density. This result reaffirms the potential of UHS\_MSP to achieve reduced memory usage and faster runtimes compared to the other two algorithms.

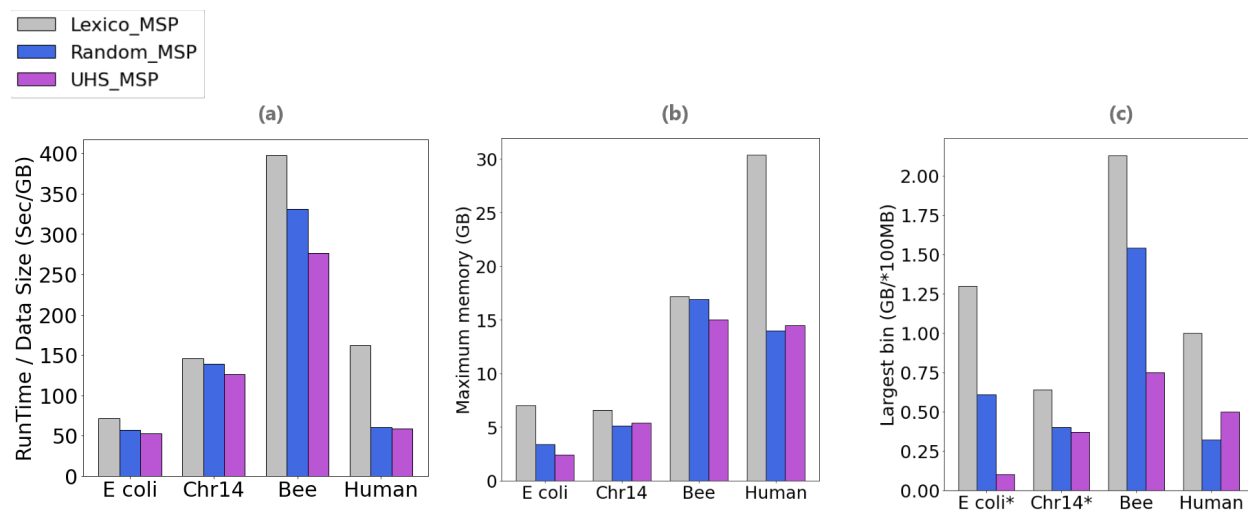

Figure 3: Performance of the three tested algorithms. (a) Runtime in seconds per GB of input data. (b) Maximum memory usage in GB. (c) Largest bin size. Numbers are in 100 MB for *E. coli* and chr14, and in GB for the human and bee genomes.

## 4.2 Performance comparison: runtime, largest bin size and memory usage

We compared the three MSP algorithms in terms of three performance criteria: (1) Runtime - the total CPU time (user time + system time); (2) Maximum memory - the maximum amount of memory the method used; and (3) Largest bin size - the size of the largest bin that was created in the partitioning step.

Figure 3a presents the runtime of the three algorithms in seconds per GB of input data. In all four datasets, UHS\_MSP was the fastest. Figure 3b displays the maximum memory used by each algorithm. UHS\_MSP used substantially less memory than Lexico\_MSP, and achieved comparable results to Random\_MSP.



| Data           | Runtime (sec) |             |                     | Maximum memory (GB) |            |                    | Largest bin (GB) |                     |                     |
|----------------|---------------|-------------|---------------------|---------------------|------------|--------------------|------------------|---------------------|---------------------|
|                | Lexico        | Random      | UHS                 | Lexico              | Random     | UHS                | Lexico           | Random              | UHS                 |
| <i>E. coli</i> | 207           | 206 ±35.6   | <b>148</b> ±5.54    | 6.96                | 6 ±1.3     | <b>4</b> ±0.5      | 0.13             | 0.12±0.05           | <b>0.025</b> ±0.01  |
| Human chr14    | 1371          | 1349±38.2   | <b>1189</b> ±68.13  | 6.66                | 5.55±0.83  | <b>5.12</b> ±0.73  | 0.067            | <b>0.036</b> ±0.008 | 0.038±0.0008        |
| Bee            | 36603         | 28159±12815 | <b>24114</b> ±10836 | 17.2                | 15.94±1.02 | <b>15.63</b> ±0.44 | 2.13             | 1.149±0.37          | <b>0.837</b> ±0.086 |

Table 2: **Performance results across different pseudo-random  $k$ -mer orders.** Average and standard deviation over five runs with different seeds are shown for the two algorithms that use a random order.

Figure 3c displays the size of the largest bin. UHS\_MSP outperformed the original Lexico\_MSP on all datasets, and improved over Random\_MSP in three of the four datasets. The results show that UHS\_MSP achieved a substantial improvement over the other algorithms in all three aspects.

As an additional test of the robustness of UHS\_MSP, we wished to gauge the effect of the pseudo-random order of the  $k$ -mers on the results. We ran Random\_MSP and UHS\_MSP, which use randomized orders, on the *E. Coli*, chr14 and Bee datasets with five different seeds, corresponding to different pseudo-random orders (Section 3). (For the human dataset, some of the runs had a technical issue, and thus it is not included). The results are presented in Table 2. While both algorithms showed substantial performance variance across orders, overall, the results are in line with those presented in Figure 3.

### 4.3 The effect of parameters $k$ , $L$ and $nb$

We tested the three algorithms on the bee data in a range of values for the parameters  $k$ ,  $L$  and  $nb$ . In each run, we kept two of the three parameters at their default values and varied the third. The results are summarized in Figure 4. Changing the number of bins shows consistent advantage to UHS\_MSP with a minor improvement as the number of bins increases (a-c). Changing  $L$  shows a similar effect (d-f). Changing  $k$  has a less consistent effect (g-i).

Li *et al.* also tested the impact of changing  $k$  and  $L$  on Lexico\_MSP [9]. The impact of varying  $k$  was consistent with what we observed here for that algorithm (Figure 4a-c) with reduction of resources needed as  $k$  increases. They also reported a similar reduction when  $L$  increases unlike a less consistent picture observed here (Figure 4d-f). Note however that they tested the range of  $L = 31 - 63$  while we tested a broader range of higher values  $L = 60 - 120$ . While varying the number of bins was not tested before, our tests here (Figure 4g-h) show improved performance with increasing  $nb$  and in a similar trend (with leveling off at high values) by the two other algorithms as well.

### 4.4 Resource usage in each step of the algorithm

To appreciate where the saving is achieved, we measured the resources consumed by each of the three MSP steps: partitioning, mapping or merging. Figure 5 summarizes the results on the bee genome. In terms of memory, the mapping step required most memory, taking an order of magnitude more memory than the partitioning and 3-5 fold more than the merging step. In all three algorithms, the mapping step was also the most time-demanding one, taking on average 89% of the time. The merging step required 7% of the time, on average, and the partitioning step was the least demanding one, taking 4% of the time. Remarkably,

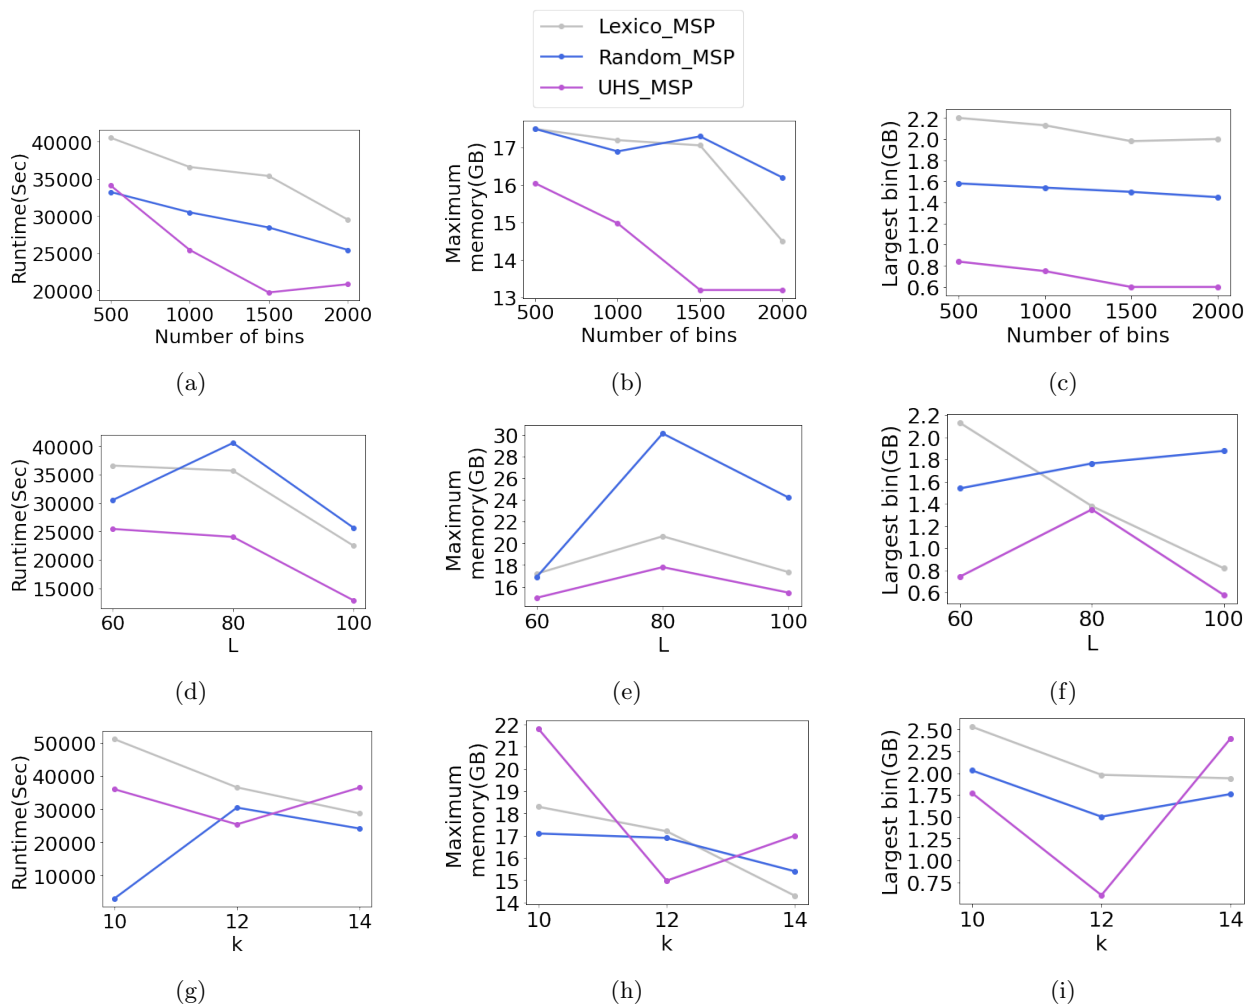

Figure 4: **The effect of changing the number of bins, the window size and the  $k$ -mer size on performance.** Results are for the bee genome. (a-c) Effect of the number of bins. (d-f) Effect of the window size  $L$ . (g-i) Effect of  $k$ . For each parameter, the runtime (sec/GB of input data), the maximum memory (GB) and the largest bin size (GB) are shown.

even though we explicitly changed only the partitioning step of the algorithm, that change led to substantial reduction in the time and memory of the mapping step. The merging step was less affected. In comparison to the original MSP algorithm, UHS\_MSP required 4% more time in the partitioning step, due to the extra work required for UHS-related computations, but was 20% faster in the mapping step. Note that for the sake of our tests, we did not utilize the possibility of parallelizing the mapping step. Future work can thus focus on improvements to the mapping step.

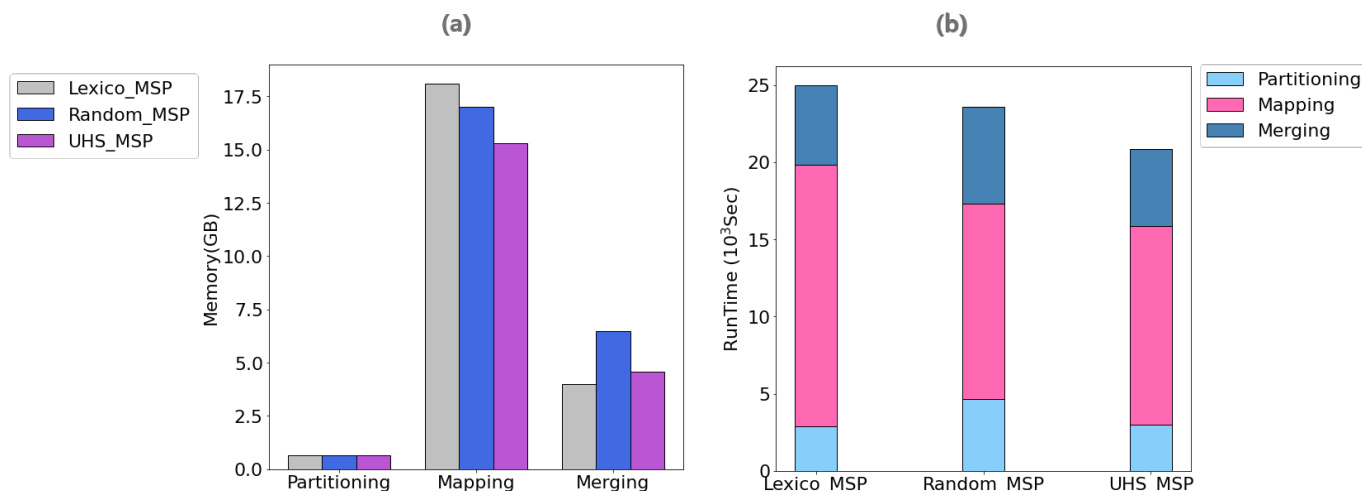

Figure 5: **Resources taken by each algorithm and each step of the algorithm on the bee genome.** (a) Maximum Memory (GB). (b) Runtime (1000 sec).

## 5 Discussion

In this study, we incorporated a UHS-based minimizers scheme in a fundamental HTS task: de Bruijn graph construction. By creating partitions based on fewer  $k$ -mers and with better statistical properties, we achieved speedups and reduced memory usage in genomic assembly. To the best of our knowledge, this is the first demonstration of the practical advantage of using UHSs in a genomic application.

Our study raises several open questions: To what extent can further improvements in the generation of smaller UHSs improve the de Bruijn graph construction? Currently the complexity of minimum size UHS still remains an open problem, though closely-related problems were shown to be computationally hard [10, 12]. Can one express the expected amount of resources needed by the UHS\_MSP algorithm (and by its separate steps), as a function of the key parameters  $k$ ,  $L$  and  $nb$ ? Obtaining such an estimate, even under a simple model such as the random string model [9], can guide one to optimize the combination of parameter values, which as we have seen tend to interact in a rather complex way (Figure 4). What is the relation between the largest bin size and the maximum memory usage? Li *et al.* argued that the maximum memory usage in MSP grows with the largest partition generated in the partitioning step [9]. Our results show a less consistent picture, at least for the human dataset (Figure 3). One reason to the difference can be the fact that the

largest partition size is defined in [9] as the number of  $k$ -mers in it, while we use the total memory size in GB.

Given the improvement achieved by a UHS in this sequencing application, it is tempting to believe that similar or even better practical improvements can be achieved in other applications that utilize minimizers. These include applications that perform partitioning of sequences as a preprocessing step for efficient parallel processing and storage [17, 2, 3, 8], applications in sequence similarity estimation [6, 11], and many others.

## 6 Acknowledgments

We thank Dan Flomin for helpful comments. This study was supported in part by the Israeli Science Foundation grant 1339/2018 and grant No. 3165/19, within the Israel Precision Medicine Partnership program (to R.S.). Y.B. and L.P. were partially supported by fellowships from the Edmond J. Safra Center for Bioinformatics at Tel-Aviv University. L.P. was also supported in part by postdoctoral fellowships from the Planning Budgeting Committee (PBC) of the Council for Higher Education (CHE) in Israel.

## References

- [1] S. Anders, P. T. Pyl, and W. Huber. HTSeq—a Python framework to work with high-throughput sequencing data. *Bioinformatics*, 31(2):166–169, 2015.
- [2] R. Chikhi, A. Limasset, and P. Medvedev. Compacting de Bruijn graphs from sequencing data quickly and in low memory. *Bioinformatics*, 32(12):i201–i208, 2016.
- [3] S. Deorowicz, M. Kokot, S. Grabowski, and A. Debudaj-Grabysz. KMC 2: fast and resource-frugal  $k$ -mer counting. *Bioinformatics*, 31(10):1569–1576, 2015.
- [4] S. Grabowski and M. Raniszewski. Sampling the suffix array with minimizers. In *International Symposium on String Processing and Information Retrieval*, pages 287–298. Springer, 2015.
- [5] W. Huber, V. J. Carey, R. Gentleman, S. Anders, M. Carlson, B. S. Carvalho, H. C. Bravo, S. Davis, L. Gatto, T. Girke, et al. Orchestrating high-throughput genomic analysis with Bioconductor. *Nature methods*, 12(2):115, 2015.
- [6] C. Jain, A. Dilthey, S. Koren, S. Aluru, and A. Phillippy. A fast approximate algorithm for mapping long reads to large reference databases. In S. Sahinalp, editor, *Research in Computational Molecular Biology. RECOMB 2017. Lecture Notes in Computer Science, vol 10229*, pages 66–81. Springer, 2017.
- [7] G. Kucherov. Evolution of biosequence search algorithms: a brief survey. *Bioinformatics*, 2019.
- [8] Y. Li et al. MSPKmerCounter: a fast and memory efficient approach for  $k$ -mer counting. *arXiv preprint arXiv:1505.06550*, 2015.
- [9] Y. Li, P. Kamousi, F. Han, S. Yang, X. Yan, and S. Suri. Memory efficient minimum substring partitioning. In *Proceedings of the VLDB Endowment*, volume 6, pages 169–180. VLDB Endowment, 2013.

- [10] G. Marçais, D. Pellow, D. Bork, Y. Orenstein, R. Shamir, and C. Kingsford. Improving the performance of minimizers and winnowing schemes. *Bioinformatics*, 33(14):i110–i117, 2017.
- [11] B. D. Ondov, T. J. Treangen, P. Melsted, A. B. Mallonee, N. H. Bergman, S. Koren, and A. M. Phillippy. Mash: fast genome and metagenome distance estimation using MinHash. *Genome biology*, 17(1):132, 2016.
- [12] Y. Orenstein, D. Pellow, G. Marçais, R. Shamir, and C. Kingsford. Designing small universal k-mer hitting sets for improved analysis of high-throughput sequencing. *PLoS computational biology*, 13(10):e1005777, 2017.
- [13] J. A. Reuter, D. V. Spacek, and M. P. Snyder. High-throughput sequencing technologies. *Molecular cell*, 58(4):586–597, 2015.
- [14] M. Roberts, W. Hayes, B. R. Hunt, S. M. Mount, and J. A. Yorke. Reducing storage requirements for biological sequence comparison. *Bioinformatics*, 20(18):3363–3369, 2004.
- [15] M. Roberts, B. R. Hunt, J. A. Yorke, R. A. Bolanos, and A. L. Delcher. A preprocessor for shotgun assembly of large genomes. *Journal of computational biology*, 11(4):734–752, 2004.
- [16] S. Schleimer, D. S. Wilkerson, and A. Aiken. Winnowing: local algorithms for document fingerprinting. In *Proceedings of the 2003 ACM SIGMOD international conference on Management of data*, pages 76–85. ACM, 2003.
- [17] D. E. Wood and S. L. Salzberg. Kraken: ultrafast metagenomic sequence classification using exact alignments. *Genome biology*, 15(3):R46, 2014.
- [18] C. Ye, Z. S. Ma, C. H. Cannon, M. Pop, and W. Y. Douglas. Exploiting sparseness in de novo genome assembly. In *BMC bioinformatics*, volume 13, page S1. BioMed Central, 2012.
